# Supplementary material
Source: publisher site journal article supplement (https://www.spandidos-publications.com/7791/downloadSupplementary)
Supplement: Supplementary file 1 [file downloadSupplementary]

Table S I . Characteristics and disease associations of F-box protein family members.

| A, FBXL                                                                                                                                                                                                          |        |                                                       |                                                                                                                       |                                                                                                                                                                |                                                                                                                  |         |
|------------------------------------------------------------------------------------------------------------------------------------------------------------------------------------------------------------------|--------|-------------------------------------------------------|-----------------------------------------------------------------------------------------------------------------------|----------------------------------------------------------------------------------------------------------------------------------------------------------------|------------------------------------------------------------------------------------------------------------------|---------|
| First author/s, year                                                                                                                                                                                             | Name   | Localization                                          | Substrate protein                                                                                                     | Biological roles (mechanisms of action) upon binding to substrates                                                                                             | Related diseases                                                                                                 | (Refs.) |
| Shapira <i>et al</i> , 2006;<br>Gao <i>et al</i> , 2009;<br>Lin <i>et al</i> , 2006;<br>Zaytseva <i>et al</i> , 2008;<br>Lu <i>et al</i> , 2004;<br>Asmamaw <i>et al</i> , 2020;<br>Sistrunk <i>et al</i> , 2013 | SKP2   | Cytoplasm, nucleus                                    | PI3K/Akt, ERK, peroxisome proliferator-activated receptor $\gamma$ , insulin-like growth factor 1, mTOR, mH2A1, CDK8, | Upon binding to PI3K/Akt, ERK, PPAR $\gamma$ , IGF1, mTOR, mH2A1, CDK8, SKP2 regulates cell cycle progression, cell migration, and mediates antiviral activity | Breast cancer, melanoma, pancreatic cancer, gastric cancer, lymphoma, prostate cancer, and nasopharyngeal cancer | (1-7)   |
| Niu <i>et al</i> , 2021;<br>Chen <i>et al</i> , 2011                                                                                                                                                             | FBXL2  | Membrane                                              | Calmodulin, PIK3R1, PTPN13                                                                                            | Upon binding to Calmodulin, PIK3R1, PTPN13, FBXL2 regulates cell cycle progression, acts as a calmodulin antagonist, and modulates inflammatory pathways       | Hepatitis C virus, Cinca syndrome                                                                                | (8,9)   |
| Ansar <i>et al</i> , 2019;<br>Correia <i>et al</i> , 2019                                                                                                                                                        | FBXL3  | Nucleus, cytoplasm                                    | CRY1, CRY2, HDAC3, KDM8                                                                                               | Upon binding to CRY1, CRY2, HDAC3, KDM8, FBXL3 regulates biological clock rhythms and protein folding processes                                                | Intellectual developmental disorder with short stature, facial anomalies, speech defects, epilepsy               | (10,11) |
| Nguyen-Dien <i>et al</i> , 2023                                                                                                                                                                                  | FBXL4  | Cytoplasm, nucleus, mitochondrion                     | VCP, PPTC7                                                                                                            | Upon binding to VCP, PPTC7, FBXL4 regulates cell cycle progression                                                                                             | Mitochondrial DNA depletion syndrome 13, mitochondrial DNA depletion syndrome                                    | (12)    |
| Ruiz <i>et al</i> , 2014;<br>Wang <i>et al</i> , 2023                                                                                                                                                            | FBXL5  | Cytoplasm (perinuclear region), nucleus               | ACO1/IRP1, IREB2/IRP2, DCTN1/p150                                                                                     | Upon binding to ACO1/IRP1, IREB2/IRP2, DCTN1/p150, FBXL5 regulates iron homeostasis, DNA damage response pathways, and protein folding processes               | Spastic paraplegia 38, autosomal dominant Alzheimer disease 3                                                    | (13,14) |
| Moro <i>et al</i> , 2020;<br>Wang <i>et al</i> , 2022                                                                                                                                                            | FBXL7  | Cytoplasm (microtubule organizing center, centrosome) | AURKA, BIRC5                                                                                                          | Upon binding to AURKA, BIRC5, FBXL7 regulates cell cycle, mitosis, and mitochondrial function                                                                  | Hennekam syndrome, autonomic peripheral neuropathy                                                               | (15,16) |
| Moro <i>et al</i> , 2020; van Jaarsveld <i>et al</i> , 2023                                                                                                                                                      | FBXL10 | Nucleus (nucleolus, chromosome)                       | PCGF1-BCORL1, CUL1, UBB                                                                                               | Upon binding to PCGF1-BCORL1, CUL1, UBB, FBXL10 exhibits histone demethylase activity and regulates cell viability and proliferation                           | Hematologic cancer, large B-cell lymphoma                                                                        | (15,17) |

|                                                          |        |                    |                                  |                                                                                                                                                      |                                                    |         |
|----------------------------------------------------------|--------|--------------------|----------------------------------|------------------------------------------------------------------------------------------------------------------------------------------------------|----------------------------------------------------|---------|
| Brunner <i>et al</i> , 2023;<br>Nita <i>et al</i> , 2016 | FBXL12 | Cytoplasm          | SKP1, CUL1                       | Upon binding to SKP1, CUL1, FBXL12 regulates cell cycle and T-cell differentiation                                                                   | -                                                  | (18,19) |
| Morohoshi <i>et al</i> , 2020                            | FBXL13 | Cytoplasm          | SKP1, CUL1, TCTE1/DRC5           | Upon binding to SKP1, CUL1, TCTE1/DRC5, FBXL13 regulates ciliary/flagellar motility                                                                  | Rumination disorder, advanced sleep phase syndrome | (20)    |
| Fang <i>et al</i> , 2017;<br>Cui <i>et al</i> , 2018     | FBXL14 | Cytoplasm          | SKP1, CUL1, SNAI1                | Upon binding to SKP1, CUL1, SNAI1, FBXL14 regulates cell cycle                                                                                       | -                                                  | (21,22) |
| Cui <i>et al</i> , 2011                                  | FBXL15 | Cytoplasm          | SMURF1, SMURF2, WWP2             | Upon binding to SMURF1, SMURF2, WWP2, FBXL15 regulates cell cycle and mitosis, and acts as a positive regulator of the BMP signaling pathway         | Bardet-Biedl syndrome 10, ceroid lipofuscinosis    | (23)    |
| Kang <i>et al</i> , 2022                                 | FBXL17 | Cytoplasm, nucleus | KLHL12, BCL6, BACH1, SUFU, PRMT1 | Upon binding to KLHL12, BCL6, BACH1, SUFU, PRMT1, FBXL17 regulates cellular responses to stimuli and maintains neuronal differentiation and survival | Medulloblastoma                                    | (24)    |
| Zhang <i>et al</i> , 2017;<br>Yu <i>et al</i> , 2023     | FBXL18 | Cytoplasm          | SKP1, CUL1, AKT                  | Upon binding to SKP1, CUL1, AKT, FBXL18 regulates cell cycle and mitosis                                                                             | Gliomas, hepatocellular carcinoma                  | (25,26) |
| Xun <i>et al</i> , 2023                                  | FBXL19 | Cytoplasm, nucleus | RHOA, RAC1, RAC3, IL1RL1, RNF20  | Upon binding to RHOA, RAC1, RAC3, IL1RL1, RNF20, FBXL19 regulates cell migration, proliferation, or cytoskeletal reorganization                      | Psoriasis 10, psoriasis 6                          | (27)    |
| Wang <i>et al</i> , 2024                                 | FBXL20 | Cytoplasm          | SKP1, CUL1                       | Upon binding to SKP1, CUL1, FBXL20 affects synaptic transmission                                                                                     | -                                                  | (28)    |
| Hirano <i>et al</i> , 2013                               | FBXL21 | Cytoplasm          | CRY1, CRY2                       | Upon binding to CRY1, CRY2, FBXL21 regulates biological clock                                                                                        | -                                                  | (29)    |

## B, FBXW

| First author/s, year                                | Name          | Localization       | Substrate protein                                                                                           | Biological roles (mechanisms of action) upon binding to substrates                                                                                                           | Related diseases                                                       | (Refs.) |
|-----------------------------------------------------|---------------|--------------------|-------------------------------------------------------------------------------------------------------------|------------------------------------------------------------------------------------------------------------------------------------------------------------------------------|------------------------------------------------------------------------|---------|
| Mo <i>et al</i> , 2022;<br>Wang <i>et al</i> , 2023 | $\beta$ -TRCP | Cytoplasm, nucleus | SKP1, SMAD3, SMAD4, CTNNB1, NFKBIA, NFKBIB, NFKBIE, NFKB1/nuclear factor NF- $\kappa$ B p105 subunit, ATF4, | Upon binding to SKP1, SMAD3, SMAD4, CTNNB1, NFKBIA, etc., $\beta$ -TRCP regulates cell cycle, mitosis, apoptosis, and the maintenance of cell pluripotency and embryogenesis | Autosomal recessive Robinow syndrome 2, split-hand/foot malformation 1 | (30,31) |

|                                                                                                                                                                                                    |            |                                                                  |                                                                                                                                                                           |                                                                                                                                                                  |                                                                            |         |
|----------------------------------------------------------------------------------------------------------------------------------------------------------------------------------------------------|------------|------------------------------------------------------------------|---------------------------------------------------------------------------------------------------------------------------------------------------------------------------|------------------------------------------------------------------------------------------------------------------------------------------------------------------|----------------------------------------------------------------------------|---------|
| Yang <i>et al</i> , 2019;<br>Yin <i>et al</i> , 2019                                                                                                                                               | FBXW2      | Cytoplasm                                                        | CDC25A, DLG1, FBXO5,<br>SNAI1, CDC34, UBE2R2,<br>ZC3H12A, HSF1,<br>IL10RA, UBR2<br>SKP1, CUL1                                                                             | Upon binding to SKP1,<br>CUL1, FBXW2 regulates cell migration<br>and protein folding                                                                             | Acute myeloid leukemia,<br>frontometaphyseal<br>dysplasia 1                | (32,33) |
| Yao <i>et al</i> , 2022                                                                                                                                                                            | FBXW5      | Cytoplasm                                                        | CDC20, EPS8, TSC1,<br>TSC2, SASS6,<br>TNFAIP8L1                                                                                                                           | Upon binding to CDC20, EPS8, TSC1,<br>TSC2, etc., FBXW5 regulates cell cycle,<br>mitosis, and protein folding                                                    | Localized chondrosarcoma,<br>Cockayne syndrome A                           | (34)    |
| Fan <i>et al</i> , 2022;<br>Fujii <i>et al</i> , 2006;<br>Yang <i>et al</i> , 2015;<br>Mao <i>et al</i> , 2004;<br>Mao <i>et al</i> , 2008;<br>Tu <i>et al</i> , 2012<br>Islam <i>et al</i> , 2021 | FBXW7      | Cytoplasm, nucleus                                               | SKP1, pseudophosphatase<br>STYX, CCNE1, CCNE2,<br>PSEN1, NOTCH1, SGK1,<br>MYC, USP28, JUN,<br>PRR7, PIN1, FAM83D,<br>MYCN, RECTOR                                         | Upon binding to SKP1, STYX, CCNE1,<br>CCNE2, etc., FBXW7 regulates cell cycle,<br>DNA repair, protein folding, bone<br>homeostasis, and glucose/lipid metabolism | Developmental delay,<br>hypotonia, impaired<br>language, colorectal cancer | (35-40) |
|                                                                                                                                                                                                    | FBXW8      | Cytoplasm (perinuclear<br>region, Golgi apparatus<br>in neurons) | CUL7, SKP1, GLMN<br>isoform 1, OBSL1, CUL1,<br>CUL2, CCT6B, PFDN5,<br>CCT2, CCT3, CCT6A,<br>CCT7, VBP1, CCDC8,<br>ARF1, TRIP13, PDCD5,<br>GORASP1,<br>MAP4K1/HPK1, POUF51 | Upon binding to CUL7, SKP1, GLMN<br>isoform 1, etc., FBXW8 regulates cell<br>proliferation and differentiation                                                   | Three M syndrome 1                                                         | (41)    |
| Franz <i>et al</i> , 2015                                                                                                                                                                          | FBXW1<br>2 | Cytoplasm                                                        | SKP1, CUL1, IL22RA1                                                                                                                                                       | Upon binding to SKP1, CUL1,<br>IL22RA1, FBXW12 acts as a cell<br>proliferation-inhibiting factor                                                                 | Mature teratoma of the<br>ovary                                            | (42)    |

### C, FBXO

| First author/s, year    | Name  | Localization                                                                                                               | Substrate protein                                                     | Biological roles (mechanisms of action)<br>upon binding to substrates                                                                                             | Related diseases                                                                                                                              | (Refs.) |
|-------------------------|-------|----------------------------------------------------------------------------------------------------------------------------|-----------------------------------------------------------------------|-------------------------------------------------------------------------------------------------------------------------------------------------------------------|-----------------------------------------------------------------------------------------------------------------------------------------------|---------|
| Lee <i>et al</i> , 2023 | FBXO1 | Nucleus, cytoplasm<br>(perinuclear region,<br>cytoskeleton,<br>microtubule organizing<br>center, centrosome,<br>centriole) | SKP1, CUL1, CCNB1,<br>CCP110, MYBL2/BMYB,<br>FZR1/CDH1, RRM2,<br>CDC6 | Upon binding to SKP1, CUL1, CCNB1,<br>CCP110, etc., FBXO1 regulates cell cycle<br>transitions, inhibits centrosome duplication<br>and maintains genomic stability | Frontotemporal dementia<br>and/or amyotrophic lateral<br>sclerosis 5, frontotemporal<br>dementia and/or<br>amyotrophic lateral<br>sclerosis 7 | (43)    |

|                                                                                  |        |                                                                               |                                                                                |                                                                                                                                                                                                     |                                                                                                            |         |
|----------------------------------------------------------------------------------|--------|-------------------------------------------------------------------------------|--------------------------------------------------------------------------------|-----------------------------------------------------------------------------------------------------------------------------------------------------------------------------------------------------|------------------------------------------------------------------------------------------------------------|---------|
| Atkin <i>et al</i> , 2014;<br>Liu <i>et al</i> , 2017;<br>Ji <i>et al</i> , 2022 | FBXO2  | Cytoplasm (microsome membrane, peripheral membrane protein, cytoplasmic side) | HADHA, GAS, N-cadherin, SUN2, CDK4, CyclinD 1, CyclinD 2, CyclinA 1, ATG4, p53 | Upon binding to HADHA, GAS, N-cadherin, etc., FBXO2 recognizes denatured glycoproteins and prevents cytoplasmic aggregate formation                                                                 | Ngly1-deficiency                                                                                           | (44-46) |
| Gao <i>et al</i> , 2022.                                                         | FBXO3  | Nucleus                                                                       | HIPK2, PML, LPS                                                                | Upon binding to HIPK2, PML, LPS, FBXO3 regulates inflammation                                                                                                                                       | Rift valley fever, esophageal neuroendocrine tumor                                                         | (47)    |
| Lee <i>et al</i> , 2013;<br>Lian <i>et al</i> , 2015                             | FBXO4  | Cytoplasm                                                                     | CCND1, TERF1, FXR1                                                             | Upon binding to CCND1, TERF1, FXR1, FBXO4 regulates pericentriolar material organization and protein folding                                                                                        | Spermatogenic failure 64, esophageal cancer                                                                | (48,49) |
| Ji <i>et al</i> , 2021;<br>Liu <i>et al</i> , 2021                               | FBXO6  | Cytoplasm                                                                     | VCP, CHEK1, CUL1                                                               | Upon binding to VCP, CHEK1, CUL1, FBXO6 regulates cell cycle, is involved in DNA damage response and regulates protein folding                                                                      | Ngly1-deficiency, lung cancer                                                                              | (50,51) |
| Zhong <i>et al</i> , 2023                                                        | FBXO7  | Cytoplasm, nucleus                                                            | DLGAP5, BIRC2, CDK6, PSMF1, PRKN, PINK1, UXT isoform 2                         | Upon binding to DLGAP5, BIRC2, CDK6, etc., FBXO7 regulates cell cycle, proliferation, maintains chromosome stability, regulates mitochondrial autophagy, and hematopoiesis                          | Parkinson disease 15, autosomal recessive early-onset; Parkinson disease 2, autosomal recessive juvenile   | (52)    |
| Duan <i>et al</i> , 2012                                                         | FBXO11 | Nucleus (chromosome)                                                          | CIITA, BCL6, DTL/CDT2, SNAI1, BAHD1, PRDM1/BLIMP1                              | Upon binding to CIITA, BCL6, DTL/CDT2, etc., FBXO11 regulates immune cell differentiation, cell cycle, migration, inflammatory response, and exhibits protein-arginine N-methyltransferase activity | Intellectual developmental disorder with dysmorphic facies and behavioral abnormalities, colorectal cancer | (53)    |
| Liu <i>et al</i> , 2021;<br>Ji <i>et al</i> , 2021                               | FBXO16 | Nucleus                                                                       | hnRNPL, ULK1, NF-κB p65 subunit                                                | Upon binding to hnRNPL, ULK1, NF-κB p65 subunit, FBXO16 regulates cell cycle                                                                                                                        | Spastic paraplegia 37, autosomal dominant, spastic paraplegia 26, autosomal recessive                      | (51,54) |
| Dobish <i>et al</i> , 2023                                                       | FBXO21 | Cytoplasm                                                                     | SKP1, CUL1                                                                     | Upon binding to SKP1, CUL1, FBXO21 regulates cell cycle                                                                                                                                             | -                                                                                                          | (55)    |
| Johmura <i>et al</i> , 2020;<br>Zhang <i>et al</i> , 2019                        | FBXO22 | Cytoplasm (myofibril, sarcomere, Z line)                                      | SKP1, CUL1, KDM4A, TP53, MTOR, BACH1                                           | Upon binding to SKP1, CUL1, KDM4A, etc., FBXO22 regulates cell cycle and acts as a senescence regulator                                                                                             | -                                                                                                          | (56,57) |

|                                                                                                                    |        |                                 |                                               |                                                                                                                                     |                                                                                                                                         |         |
|--------------------------------------------------------------------------------------------------------------------|--------|---------------------------------|-----------------------------------------------|-------------------------------------------------------------------------------------------------------------------------------------|-----------------------------------------------------------------------------------------------------------------------------------------|---------|
| Santra <i>et al</i> , 2009;<br>Zou <i>et al</i> , 2018;<br>Malonia <i>et al</i> , 2015;<br>Liu <i>et al</i> , 2014 | FBXO31 | Cytoplasm                       | CCND1, OGT, CD147,<br>SIRT2, GPX4             | Upon binding to CCND1, OGT, CD147,<br>etc., FBXO31 regulates cell cycle and acts<br>as a tumor suppressor                           | Intellectual developmental<br>disorder, autosomal<br>recessive 45, autosomal<br>recessive non-syndromic<br>intellectual disability      | (58-61) |
| Wu <i>et al</i> , 2024;<br>Habel <i>et al</i> , 2021                                                               | FBXO32 | Cytoplasm, nucleus              | TERF1, PTEN, cyclin D,<br>MYC                 | Upon binding to TERF1, PTEN, cyclin D,<br>MYC, FBXO32 regulates gene<br>transcription and is associated with<br>muscular dystrophy  | Left ventricular<br>noncompaction, dilated<br>cardiomyopathy                                                                            | (62,63) |
| Zheng <i>et al</i> , 2023;<br>Meng <i>et al</i> , 2018                                                             | FBXO38 | Cytoplasm (cytosol),<br>nucleus | PDCD1/PD-1, KLF7                              | Upon binding to PDCD1/PD-1,<br>KLF7, FBXO38 modulates T-cell<br>immunity and acts as a tumor suppressor                             | Neuronopathy, distal<br>hereditary motor,<br>autosomal dominant 6,<br>neuronopathy, distal<br>hereditary motor,<br>autosomal dominant 2 | (64,65) |
| Richter <i>et al</i> , 2020;<br>Chung <i>et al</i> , 2014                                                          | FBXO45 | Cytoplasm, nucleus              | HEY1, N-cadherin/CDH2,<br>TP73, NMNAT2, FBXW7 | Upon binding to HEY1, N-<br>cadherin/CDH2, etc., FBXO45 regulates<br>cell cycle, mitosis, synaptogenesis, and<br>neuronal migration | Spermatogenic failure 64,<br>chromosome 3Q29<br>microduplication<br>syndrome                                                            | (66,67) |

---

BMP, bone morphogenetic protein; FBXL, F-box proteins with leucine-rich amino acid repeats; FBXO, F-box only protein; FBXW, F-box proteins with WD-40 amino acid repeats; Ngly1, N-glycanase 1.

Table S II . Core molecular mechanisms and biological effects involving FBXO2 in tumor diseases.

| First author/s, year                                   | Tumor type                  | Core mechanism                                                                                                                                          | Key molecules/signaling pathways                                              | E2 ligase        | E3 ligase                                                    | Biological roles (FBXO2 upon substrate binding)                                                                                                                                   | (Refs.) |
|--------------------------------------------------------|-----------------------------|---------------------------------------------------------------------------------------------------------------------------------------------------------|-------------------------------------------------------------------------------|------------------|--------------------------------------------------------------|-----------------------------------------------------------------------------------------------------------------------------------------------------------------------------------|---------|
| Sun <i>et al</i> , 2018                                | Gastric cancer              | FBXO2 regulates EMT to exert its effect                                                                                                                 | E-cadherin, N-cadherin, vimentin                                              | UBE2D3           | SCF-FBXO2 complex (consisting of SKP1, CUL1, RBX1 and FBXO2) | FBXO2 promotes proliferation, migration and invasion; low expression inhibits the proliferation, migration and invasion of GC cells by reducing EMT                               | (68)    |
| Wei <i>et al</i> , 2018; Zhao <i>et al</i> , 2022      | Colorectal cancer           | FBXO2 mediates EMT involvement in metastasis through UPS-mediated degradation of tumor suppressor proteins and by influencing the Wnt signaling pathway | N-cadherin, $\beta$ -catenin, Wnt signaling pathway                           |                  |                                                              | FBXO2 promotes proliferation, infiltration and distant metastasis; inhibition of FBXO2 can improve prognosis, and the expression levels can be used as a biomarker for metastasis | (69,70) |
| Ji <i>et al</i> , 2022; Lai <i>et al</i> , 2024        | Ovarian cancer              | SOX6-FBXO2-SUN2 axis; pathways related to chemotherapy resistance                                                                                       | SOX6, SUN2 (ubiquitination-dependent degradation), PI3K-Akt signaling pathway |                  |                                                              | FBXO2 inhibits apoptosis and promotes proliferation; related to chemotherapy resistance (knockdown of FBXO2 reduces the IC <sub>50</sub> of cisplatin)                            | (46,71) |
| Che <i>et al</i> , 2020                                | EC                          | Ubiquitination-mediated degradation of FBN1, regulating the cell cycle and autophagy pathways                                                           | FBN1 (degradation), CDK4, CyclinD1/2, CyclinA1, ATG4A/4D                      | UBE2D2 or UBE2D3 |                                                              | Promotes proliferation; targeting FBXO2 may enable the treatment of EC by regulating the cell cycle and autophagy pathways                                                        | (72)    |
| Zhao <i>et al</i> , 2020                               | Osteosarcoma                | Stabilizes IL-6R and activates the STAT3 signaling pathway                                                                                              | IL-6R (stable), STAT3 (phosphorylated and activated)                          | -                | -                                                            | Promotes proliferation; inhibition of FBXO2 can shorten the half-life of IL-6R and inhibit the STAT3 pathway                                                                      | (73)    |
| Buehler <i>et al</i> , 2023; Atkin <i>et al</i> , 2015 | GB                          | Participates in the interaction between glioma and the microenvironment, and regulates synaptic-related molecules                                       | NMDAR subunits (GluN1, GluN2A), synaptic signals                              | UBE2D3           | SCF-FBXO2 complex (consisting of SKP1, CUL1, RBX1 and FBXO2) | Promotes invasive growth; highly expressed in recurrent GB; inhibition can improve survival rate                                                                                  | (74,75) |
| Guo <i>et al</i> , 2024                                | Papillary thyroid carcinoma | Ubiquitination-mediated degradation of the tumor suppressor protein p53                                                                                 | p53 (ubiquitination-dependent degradation)                                    |                  |                                                              | Facilitates cell proliferation and exhibits a positive association with tumor size and metastasis; knockdown can inhibit proliferation and promote apoptosis                      | (76)    |

|                              |                                    |                                                                                                        |                                                                                                                                         |                                                                                                                                         |      |
|------------------------------|------------------------------------|--------------------------------------------------------------------------------------------------------|-----------------------------------------------------------------------------------------------------------------------------------------|-----------------------------------------------------------------------------------------------------------------------------------------|------|
| Cheng <i>et al</i> ,<br>2025 | Oral<br>squamous cell<br>carcinoma | FBXO2 regulates the<br>transformation of malignant<br>clones, and influences the cell<br>cycle and EMT | Cyclin D1/E1, CDK4/2,<br>E-cadherin, N-cadherin,<br>Vimentin; PI3K-Akt<br>signaling pathway,<br>Cyclin-CDK-pRb-E2F<br>signaling pathway | Promotes the formation of highly<br>malignant clones; enhances<br>proliferation, migration, invasion and<br>anti-apoptotic capabilities | (77) |
|------------------------------|------------------------------------|--------------------------------------------------------------------------------------------------------|-----------------------------------------------------------------------------------------------------------------------------------------|-----------------------------------------------------------------------------------------------------------------------------------------|------|

---

FBXO2, F-box protein 2; SCF, S-phase kinase-associated protein 1-Cullin-F-box; UPS, ubiquitin-proteasome system; E1, ubiquitin-activating enzyme; E2, ubiquitin-conjugating enzyme; E3, ubiquitin ligase; EMT, epithelial-mesenchymal transition; CRC, colorectal cancer; OV, ovarian cancer; EC, endometrial cancer; OS, osteosarcoma; GB, glioblastoma; PTC, papillary thyroid carcinoma; OSCC, oral squamous cell carcinoma; FBN1, fibrillin 1; IL-6R, interleukin-6 receptor; STAT3, signal transducer and activator of transcription 3; NMDAR, N-methyl-D-aspartate receptor; p53, tumor protein p53; VEGF, vascular endothelial growth factor; PTEN, phosphatase and tensin homolog; PI3K-Akt-mTOR, phosphatidylinositol 3-kinase-protein kinase B-mammalian target of rapamycin; NRF2, nuclear factor erythroid 2-related factor 2; MAPK, mitogen-activated protein kinase; SUN2, Sad1 and UNC84 domain-containing protein 2; APC/C, anaphase-promoting complex; CDC20, cell division cycle 20; CDH1, cadherin 1; MDM2, murine double minute 2 homolog; FBXL, F-box protein with leucine-rich amino acid repeats; FBXW, F-box protein with WD-40 amino acid repeats; FBP, F-box protein; ROC1, Ring Box Protein 1/RING-box 1/HRT1 (RING-box protein HRT1); CDK, cyclin-dependent kinase; IR, insulin receptor; NAFLD, non-alcoholic fatty liver disease; PD, Parkinson's disease; AD, Alzheimer's disease; NPC, Niemann-Pick C disease; OA, osteoarthritis; IVD, intervertebral disc; GAS, group A streptococcus; gB, Epstein-Barr virus glycoprotein B; SNAIL, Snail homolog 1; TWIST, Twist protein; Mcl-1, myeloid cell leukemia-1 protein; XIAP, X-linked inhibitor of apoptosis protein; GluN1, GluN1 subunit of NMDAR; GluN2A, GluN2A subunit of NMDAR; Ki-67, a nuclear antigen associated with cell proliferation; SIRT2, sirtuin 2; Myc, proto-oncogene Myc; MAPKK6, mitogen-activated protein kinase kinase 6; CDCP1, CUB domain-containing protein 1; USP13, ubiquitin-specific peptidase 13; FBXW7, F-box protein with WD-40 repeats 7; FBXO4, F-box protein with only uncharacterized structural domains 4; FBXO11, F-box protein with only uncharacterized structural domains 11; FBXO31, F-box protein with only uncharacterized structural domains 31; FBXL14, F-box protein with leucine-rich amino acid repeats 14; FBXO22, F-box protein with only uncharacterized structural domains 22; FBXO32, F-box protein with only uncharacterized structural domains 32; FBXO38, F-box protein with only uncharacterized structural domains 38; FBXO45, F-box protein with only uncharacterized structural domains 45; NEDD4-1, neurologically expressed developmentally downregulated 4-1; HECT, homologous to the E6-associated protein C-terminus; CRL, Cullin-RING ligases; CRL1, Cullin-RING ligase 1; FBA, F-box domain; SBD, glycoprotein-binding domain; NFB42, neural F-box 42 kDa; ATG4A, autophagy related 4A cysteine peptidase; ATG4D, autophagy related 4D cysteine peptidase; HGSOC, high-grade serous ovarian cancer; RNASET2, ribonuclease T2; hnRNPL, heterogeneous nuclear ribonucleoprotein L; FZR1, cell-cycle-regulated F-box protein 1; CNTO328, an IL-6R neutralizing antibody; Stattic, a STAT3 inhibitor; UBE2D2, ubiquitin-conjugating enzyme E2 D2; UBE2D3, ubiquitin-conjugating enzyme E2 D3; RBX1, RING-box protein 1; Smyd3, histone methyltransferase Smyd3; BACH1, BTB and CNC homology 1.

## References

1. Shapira M, Kakiashvili E, Rosenberg T, Hershko DD. The mTOR inhibitor rapamycin down-regulates the expression of the ubiquitin ligase subunit Skp2 in breast cancer cells. *Breast Cancer Res BCR*. 2006;8(4):R46.
2. Gao D, Inuzuka H, Tseng A, Chin RY, Toker A, Wei W. Phosphorylation by Akt1 promotes cytoplasmic localization of Skp2 and impairs APCDdh1-mediated Skp2 destruction. *Nat Cell Biol*. 2009 Apr;11(4):397–408.
3. Lin YW, Yang JL. Cooperation of ERK and SCFSkp2 for MKP-1 destruction provides a positive feedback regulation of proliferating signaling. *J Biol Chem*. 2006 Jan 13;281(2):915–26.
4. Zaytseva YY, Wang X, Southard RC, Wallis NK, Kilgore MW. Down-regulation of PPARgamma1 suppresses cell growth and induces apoptosis in MCF-7 breast cancer cells. *Mol Cancer*. 2008 Dec 5;7:90.
5. Lu Y, Zi X, Pollak M. Molecular mechanisms underlying IGF-I-induced attenuation of the growth-inhibitory activity of trastuzumab (Herceptin) on SKBR3 breast cancer cells. *Int J Cancer*. 2004 Jan 20;108(3):334–41.
6. Asmamaw MD, Liu Y, Zheng YC, Shi XJ, Liu HM. Skp2 in the ubiquitin-proteasome system: A comprehensive review. *Med Res Rev*. 2020 Sept;40(5):1920–49.
7. Sistrunk C, Kim SH, Wang X, Lee SH, Kim Y, Macias E, *et al*. Skp2 deficiency inhibits chemical skin tumorigenesis independent of p27(Kip1) accumulation. *Am J Pathol*. 2013 May;182(5):1854–64.
8. Niu M, Xu J, Liu Y, Li Y, He T, Ding L, *et al*. FBXL2 counteracts grp94 to destabilize EGFR and inhibit EGFR-driven NSCLC growth. *Nat Commun*. 2021 Oct 11;12(1):5919.
9. Chen BB, Glasser JR, Coon TA, Mallampalli RK. FBXL2 is a ubiquitin e3 ligase subunit that triggers mitotic arrest. *Cell Cycle Georget Tex*. 2011 Oct 15;10(20):3487–94.
10. Ansar M, Paracha SA, Serretti A, Sarwar MT, Khan J, Ranza E, *et al*. Biallelic variants in FBXL3 cause intellectual disability, delayed motor development and short stature. *Hum Mol Genet*. 2019 Mar 15;28(6):972–9.
11. Correia SP, Chan AB, Vaughan M, Zolboot N, Perea V, Huber AL, *et al*. The circadian e3 ligase complex SCFFBXL3+CRY targets TLK2. *Sci Rep*. 2019 Jan 17;9(1):198.
12. Nguyen-Dien GT, Kozul KL, Cui Y, Townsend B, Kulkarni PG, Ooi SS, *et al*. FBXL4 suppresses mitophagy by restricting the accumulation of NIX and BNIP3 mitophagy receptors. *EMBO J*. 2023 July 3;42(13):e112767.
13. Ruiz JC, Bruick RK. F-box and leucine-rich repeat protein 5 (FBXL5): Sensing intracellular iron and oxygen. *J Inorg Biochem*. 2014 Apr;133:73–7.
14. Wang S, Wu X, Wang H, Song S, Hu Y, Guo Y, *et al*. Role of FBXL5 in redox homeostasis and spindle assembly during oocyte maturation in mice. *FASEB J Off Publ Fed Am Soc Exp Biol*. 2023 Aug;37(8):e23080.
15. Moro L, Pagano M. Epigenetic suppression of FBXL7 promotes metastasis. *Mol Cell Oncol*. 2020 Oct 22;7(6):1833698.
16. Wang Y, Shen X, Gong L, Zhao Y, Xiong X. Functional characterization of FBXL7 as a novel player in human cancers. *Cell Death Discov*. 2022 July 29;8(1):342.
17. van Jaarsveld RH, Reilly J, Cornips MC, Hadders MA, Agolini E, Ahimaz P, *et al*. Delineation of a KDM2B-related neurodevelopmental disorder and its associated DNA methylation signature. *Genet Med Off J Am Coll Med Genet*. 2023 Jan;25(1):49–62.
18. Brunner A, Li Q, Fiscaro S, Kourtesakis A, Viiliäinen J, Johansson HJ, *et al*. FBXL12 degrades FANCD2 to regulate replication recovery and promote cancer cell survival under conditions of replication stress. *Mol Cell*. 2023 Oct 19;83(20):3720-3739.e8.
19. Nita A, Nishiyama M, Muto Y, Nakayama KI. FBXL12 regulates T-cell differentiation in a cell-autonomous manner. *Genes Cells Devoted Mol Cell Mech*. 2016 May;21(5):517–24.
20. Morohoshi A, Miyata H, Shimada K, Nozawa K, Matsumura T, Yanase R, *et al*. Nexin-dynein regulatory complex component DRC7 but not FBXL13 is required for sperm flagellum formation and male fertility in mice. *PLoS Genet*. 2020 Jan;16(1):e1008585.
21. Fang X, Zhou W, Wu Q, Huang Z, Shi Y, Yang K, *et al*. Deubiquitinase USP13 maintains glioblastoma stem cells by antagonizing FBXL14-mediated Myc ubiquitination. *J Exp Med*. 2017 Jan;214(1):245–67.
22. Cui YH, Kim H, Lee M, Yi JM, Kim RK, Uddin N, *et al*. FBXL14 abolishes breast cancer progression by targeting CDCP1 for proteasomal degradation. *Oncogene*. 2018

- Oct;37(43):5794–809.
23. Cui Y, He S, Xing C, Lu K, Wang J, Xing G, *et al.* SCFFBXL<sup>15</sup> regulates BMP signalling by directing the degradation of HECT-type ubiquitin ligase smurf1. *EMBO J.* 2011 May 13;30(13):2675–89.
  24. Kang HM, Kim DH, Kim M, Min Y, Jeong B, Noh KH, *et al.* FBXL17/spastin axis as a novel therapeutic target of hereditary spastic paraplegia. *Cell Biosci.* 2022 July 22;12(1):110.
  25. Zhang J, Yang Z, Ou J, Xia X, Zhi F, Cui J. The F-box protein FBXL18 promotes glioma progression by promoting K63-linked ubiquitination of akt. *FEBS Lett.* 2017 Jan;591(1):145–54.
  26. Yu HQ, Li F, Xiong H, Fang L, Zhang J, Bie P, *et al.* Elevated FBXL18 promotes RPS15A ubiquitination and SMAD3 activation to drive HCC. *Hepatol Commun.* 2023 July 1;7(7):e00198.
  27. Xun M, Wang J, Xie Q, Peng B, Li Z, Guo Z, *et al.* FBXL19 promotes malignant behaviours by activating MAPK signalling and negatively correlates with prognosis in hepatocellular carcinoma. *Heliyon.* 2023 Nov;9(11):e21771.
  28. Wang W, Li Y, Wang L, Chen X, Lan T, Wang C, *et al.* FBXL20 promotes synaptic impairment in depression disorder via degrading vesicle-associated proteins. *J Affect Disord.* 2024 Mar 15;349:132–44.
  29. Hirano A, Yumimoto K, Tsunematsu R, Matsumoto M, Oyama M, Kozuka-Hata H, *et al.* FBXL21 regulates oscillation of the circadian clock through ubiquitination and stabilization of cryptochromes. *Cell.* 2013 Feb 28;152(5):1106–18.
  30. Mo Y, Wang Y, Wang Y, Deng X, Yan Q, Fan C, *et al.* Circular RNA circPVT1 promotes nasopharyngeal carcinoma metastasis via the  $\beta$ -TrCP/c-myc/SRSF1 positive feedback loop. *Mol Cancer.* 2022 Oct 5;21(1):192.
  31. Wang S, Wang Y, Li Q, Li X, Feng X, Zeng K. The novel  $\beta$ -TrCP protein isoform hidden in circular RNA confers trastuzumab resistance in HER2-positive breast cancer. *Redox Biol.* 2023 Nov;67:102896.
  32. Yang F, Xu J, Li H, Tan M, Xiong X, Sun Y. FBXW2 suppresses migration and invasion of lung cancer cells via promoting  $\beta$ -catenin ubiquitylation and degradation. *Nat Commun.* 2019 Mar 27;10(1):1382.
  33. Yin Y, Xie CM, Li H, Tan M, Chen G, Schiff R, *et al.* The FBXW2-MSX2-SOX2 axis regulates stem cell property and drug resistance of cancer cells. *Proc Natl Acad Sci U S A.* 2019 Oct 8;116(41):20528–38.
  34. Yao Y, Liu Z, Huang S, Huang C, Cao Y, Li L, *et al.* The e3 ubiquitin ligase, FBXW5, promotes the migration and invasion of gastric cancer through the dysregulation of the hippo pathway. *Cell Death Discov.* 2022 Feb 24;8(1):79.
  35. Fan J, Bellon M, Ju M, Zhao L, Wei M, Fu L, *et al.* Clinical significance of FBXW7 loss of function in human cancers. *Mol Cancer.* 2022 Mar 26;21(1):87.
  36. Fujii Y, Yada M, Nishiyama M, Kamura T, Takahashi H, Tsunematsu R, *et al.* Fbxw7 contributes to tumor suppression by targeting multiple proteins for ubiquitin-dependent degradation. *Cancer Sci.* 2006 Aug;97(8):729–36.
  37. Yang H, Lu X, Liu Z, Chen L, Xu Y, Wang Y, *et al.* FBXW7 suppresses epithelial-mesenchymal transition, stemness and metastatic potential of cholangiocarcinoma cells. *Oncotarget.* 2015 Mar 20;6(8):6310–25.
  38. Mao JH, Perez-Losada J, Wu D, Delrosario R, Tsunematsu R, Nakayama KI, *et al.* Fbxw7/Cdc4 is a p53-dependent, haploinsufficient tumour suppressor gene. *Nature.* 2004 Dec 9;432(7018):775–9.
  39. Mao JH, Kim IJ, Wu D, Climent J, Kang HC, DelRosario R, *et al.* FBXW7 targets mTOR for degradation and cooperates with PTEN in tumor suppression. *Science.* 2008 Sept 12;321(5895):1499–502.
  40. Tu K, Zheng X, Yin G, Zan X, Yao Y, Liu Q. Evaluation of Fbxw7 expression and its correlation with expression of SREBP-1 in a mouse model of NAFLD. *Mol Med Rep.* 2012 Sept;6(3):525–30.
  41. Islam S, Dutta P, Chopra K, Rapole S, Chauhan R, Santra MK. FBXW8 regulates G1 and S phases of cell cycle progression by restricting  $\beta$ -TrCP1 function. *FEBS J.* 2021

- Sept;288(18):5474–97.
42. Franz J, Jerome J, Lear T, Gong Q, Weathington NM. The human IL-22 receptor is regulated through the action of the novel e3 ligase subunit FBXW12, which functions as an epithelial growth suppressor. *J Immunol Res.* 2015;2015:912713.
  43. Lee GE, Jeung D, Chen W, Byun J, Lee JY, Kang HC, *et al.* MEKs/ERKs-mediated FBXO1/E2Fs interaction interference modulates g1/S cell cycle transition and cancer cell proliferation. *Arch Pharm Res.* 2023 Jan;46(1):44–58.
  44. Atkin G, Hunt J, Minakawa E, Sharkey L, Tipper N, Tennant W, *et al.* F-box Only Protein 2 (Fbxo2) Regulates Amyloid Precursor Protein Levels and Processing. *J Biol Chem.* 2014 Mar 7;289(10):7038–48.
  45. Liu B, Lu H, Li D, Xiong X, Gao L, Wu Z, *et al.* Aberrant Expression of FBXO2 Disrupts Glucose Homeostasis Through Ubiquitin-Mediated Degradation of Insulin Receptor in Obese Mice. *Diabetes.* 2017 Mar;66(3):689–98.
  46. Ji J, Shen J, Xu Y, Xie M, Qian Q, Qiu T, *et al.* FBXO2 targets glycosylated SUN2 for ubiquitination and degradation to promote ovarian cancer development. *Cell Death Dis.* 2022 May 7;13(5):442.
  47. Gao Y, Xiao X, Luo J, Wang J, Peng Q, Zhao J, *et al.* E3 ubiquitin ligase FBXO3 drives neuroinflammation to aggravate cerebral ischemia/reperfusion injury. *Int J Mol Sci.* 2022 Nov 7;23(21):13648.
  48. Lee EK, Lian Z, D’Andrea K, Letrero R, Sheng W, Liu S, *et al.* The FBXO4 tumor suppressor functions as a barrier to BRAFV600E-dependent metastatic melanoma. *Mol Cell Biol.* 2013 Nov;33(22):4422–33.
  49. Lian Z, Lee EK, Bass AJ, Wong KK, Klein-Szanto AJ, Rustgi AK, *et al.* FBXO4 loss facilitates carcinogen induced papilloma development in mice. *Cancer Biol Ther.* 2015;16(5):750–5.
  50. Ji M, Zhao Z, Li Y, Xu P, Shi J, Li Z, *et al.* FBXO6-mediated RNASET2 ubiquitination and degradation governs the development of ovarian cancer. *Cell Death Dis.* 2021 Mar 25;12(4):317.
  51. Liu Y, Pan B, Qu W, Cao Y, Li J, Zhao H. Systematic analysis of the expression and prognosis relevance of FBXO family reveals the significance of FBXO1 in human breast cancer. *Cancer Cell Int.* 2021 Dec;21(1):130.
  52. Zhong Y, Li J, Ye M, Jin X. The characteristics of FBXO7 and its role in human diseases. *Gene.* 2023 Jan 30;851:146972.
  53. Duan S, Cermak L, Pagan JK, Rossi M, Martinengo C, di Celle PF, *et al.* FBXO11 targets BCL6 for degradation and is inactivated in diffuse large B-cell lymphomas. *Nature.* 2012 Jan 5;481(7379):90–3.
  54. Ji M, Zhao Z, Li Y, Xu P, Shi J, Li Z, *et al.* FBXO16-mediated hnRNPL ubiquitination and degradation plays a tumor suppressor role in ovarian cancer. *Cell Death Dis.* 2021 July 31;12(8):758.
  55. Dobish KK, Wittorf KJ, Swenson SA, Bean DC, Gavile CM, Woods NT, *et al.* FBXO21 mediated degradation of p85 $\alpha$  regulates proliferation and survival of acute myeloid leukemia. *Leukemia.* 2023 Nov;37(11):2197–208.
  56. Johmura Y, Harris AS, Ohta T, Nakanishi M. FBXO22, an epigenetic multiplayer coordinating senescence, hormone signaling, and metastasis. *Cancer Sci.* 2020 Aug;111(8):2718–25.
  57. Zhang L, Chen J, Ning D, Liu Q, Wang C, Zhang Z, *et al.* FBXO22 promotes the development of hepatocellular carcinoma by regulating the ubiquitination and degradation of p21. *J Exp Clin Cancer Res CR.* 2019 Feb 26;38(1):101.
  58. Santra MK, Wajapeyee N, Green MR. F-box protein FBXO31 mediates cyclin D1 degradation to induce G1 arrest after DNA damage. *Nature.* 2009 June 4;459(7247):722–5.
  59. Zou S, Ma C, Yang F, Xu X, Jia J, Liu Z. FBXO31 Suppresses Gastric Cancer EMT by Targeting Snail1 for Proteasomal Degradation. *Mol Cancer Res MCR.* 2018 Feb;16(2):286–95.
  60. Malonia SK, Dutta P, Santra MK, Green MR. F-box protein FBXO31 directs degradation of MDM2 to facilitate p53-mediated growth arrest following genotoxic stress. *Proc Natl Acad Sci U S A.* 2015 July 14;112(28):8632–7.

61. Liu J, Han L, Li B, Yang J, Huen MSY, Pan X, *et al.* F-box only protein 31 (FBXO31) negatively regulates p38 mitogen-activated protein kinase (MAPK) signaling by mediating lysine 48-linked ubiquitination and degradation of mitogen-activated protein kinase kinase 6 (MKK6). *J Biol Chem.* 2014 Aug 1;289(31):21508–18.
62. Wu J, Wen T, Marzio A, Song D, Chen S, Yang C, *et al.* FBXO32-mediated degradation of PTEN promotes lung adenocarcinoma progression. *Cell Death Dis.* 2024 Apr 20;15(4):282.
63. Habel N, El-Hachem N, Soysouvanh F, Hadhiri-Bziouche H, Giuliano S, Nguyen S, *et al.* FBXO32 links ubiquitination to epigenetic reprogramming of melanoma cells. *Cell Death Differ.* 2021 June;28(6):1837–48.
64. Zheng X, Jiang Q, Han M, Ye F, Wang M, Qiu Y, *et al.* FBXO38 regulates macrophage polarization to control the development of cancer and colitis. *Cell Mol Immunol.* 2023 Nov;20(11):1367–78.
65. Meng X, Liu X, Guo X, Jiang S, Chen T, Hu Z, *et al.* FBXO38 mediates PD-1 ubiquitination and regulates anti-tumour immunity of T cells. *Nature.* 2018 Dec;564(7734):130–5.
66. Richter KT, Kschonsak YT, Vodicska B, Hoffmann I. FBXO45-MYCBP2 regulates mitotic cell fate by targeting FBXW7 for degradation. *Cell Death Differ.* 2020 Feb;27(2):758–72.
67. Chung FZ, Sahasrabudhe AA, Ma K, Chen X, Basrur V, Lim MS, *et al.* Fbxo45 inhibits calcium-sensitive proteolysis of N-cadherin and promotes neuronal differentiation. *J Biol Chem.* 2014 Oct 10;289(41):28448–59.
68. Sun X, Wang T, Guan ZR, Zhang C, Chen Y, Jin J, *et al.* FBXO2, a novel marker for metastasis in human gastric cancer. *Biochem Biophys Res Commun.* 2018 Jan 15;495(3):2158–64.
69. X W, J B, X M, B L, X W, B H. The prognostic significance of FBXO2 expression in colorectal cancer. *Int J Clin Exp Pathol [Internet].* 2018 Jan 10 [cited 2025 July 9];11(10). Available from: <https://pubmed.ncbi.nlm.nih.gov/31949582/>
70. Zhao H, Ming T, Tang S, Ren S, Yang H, Liu M, *et al.* Wnt signaling in colorectal cancer: pathogenic role and therapeutic target. *Mol Cancer.* 2022 July 14;21(1):144.
71. W L, R X, C C, W L, H Y, L D, *et al.* Integrated analysis of scRNA-seq and bulk RNA-seq identifies FBXO2 as a candidate biomarker associated with chemoresistance in HGSOc. *Heliyon [Internet].* 2024 Mar 25 [cited 2025 July 7];10(7). Available from: <https://pubmed.ncbi.nlm.nih.gov/38590858/>
72. Che X, Jian F, Wang Y, Zhang J, Shen J, Cheng Q, *et al.* FBXO2 Promotes Proliferation of Endometrial Cancer by Ubiquitin-Mediated Degradation of FBN1 in the Regulation of the Cell Cycle and the Autophagy Pathway. *Front Cell Dev Biol.* 2020 Aug 31;8:843.
73. Zhao X, Guo W, Zou L, Hu B. FBXO2 modulates STAT3 signaling to regulate proliferation and tumorigenicity of osteosarcoma cells. *Cancer Cell Int.* 2020 Dec;20(1):245.
74. Buehler M, Yi X, Ge W, Blattmann P, Rushing E, Reifenberger G, *et al.* Quantitative proteomic landscapes of primary and recurrent glioblastoma reveal a protumorigenic role for FBXO2-dependent glioma-microenvironment interactions. *Neuro-Oncol.* 2023 Feb 14;25(2):290–302.
75. Atkin G, Moore S, Lu Y, Nelson RF, Tipper N, Rajpal G, *et al.* Loss of F-box Only Protein 2 (Fbxo2) Disrupts Levels and Localization of Select NMDA Receptor Subunits, and Promotes Aberrant Synaptic Connectivity. *J Neurosci.* 2015 Apr 15;35(15):6165–78.
76. Guo W, Ren Y, Qiu X. FBXO2 promotes the progression of papillary thyroid carcinoma through the p53 pathway. *Sci Rep.* 2024 Sept 29;14(1):22574.
77. Cheng J, Liu O, Bin X, Tang Z. FBXO2 as a switch guides a special fate of tumor clones evolving into a highly malignant transcriptional subtype in oral squamous cell carcinoma. *Apoptosis Int J Program Cell Death.* 2025 Feb;30(1–2):167–84.
